# Supplementary material for: Distributed Bayesian Computation and Self-Organized Learning in Sheets of Spiking Neurons with Local Lateral Inhibition
Source: PLoS One. 2015 Aug 18;10(8):e0134356. doi: 10.1371/journal.pone.0134356 (PMC4540468; doi:10.1371/journal.pone.0134356)
Supplement: S1 Code — (ZIP) [file pone.0134356.s001.zip]

Archive with 363 entries (255 files):
- Code_Bill_et_al_2015/
- Code_Bill_et_al_2015/liveplot/
- Code_Bill_et_al_2015/liveplot/LivePlot.py
- Code_Bill_et_al_2015/liveplot/panel/
- Code_Bill_et_al_2015/liveplot/panel/BaseClassPanel.py
- Code_Bill_et_al_2015/liveplot/panel/TestPanel.py
- Code_Bill_et_al_2015/liveplot/panel/HistogramPanel.py
- Code_Bill_et_al_2015/liveplot/panel/SpiketrainPanel.py
- Code_Bill_et_al_2015/liveplot/panel/ImageGridPanel.py
- Code_Bill_et_al_2015/liveplot/panel/BarPanel.py
- Code_Bill_et_al_2015/liveplot/panel/.svn/
- Code_Bill_et_al_2015/liveplot/panel/.svn/props/
- Code_Bill_et_al_2015/liveplot/panel/.svn/tmp/
- Code_Bill_et_al_2015/liveplot/panel/.svn/tmp/props/
- Code_Bill_et_al_2015/liveplot/panel/.svn/tmp/text-base/
- Code_Bill_et_al_2015/liveplot/panel/.svn/tmp/prop-base/
- Code_Bill_et_al_2015/liveplot/panel/.svn/all-wcprops
- Code_Bill_et_al_2015/liveplot/panel/.svn/text-base/
- Code_Bill_et_al_2015/liveplot/panel/.svn/text-base/__init__.py.svn-base
- Code_Bill_et_al_2015/liveplot/panel/.svn/text-base/EmptyPanel.py.svn-base
- Code_Bill_et_al_2015/liveplot/panel/.svn/text-base/ReceptiveFieldsPanel.py.svn-base
- Code_Bill_et_al_2015/liveplot/panel/.svn/text-base/BarPanel.py.svn-base
- Code_Bill_et_al_2015/liveplot/panel/.svn/text-base/RecurrentConnectionsPanel.py.svn-base
- Code_Bill_et_al_2015/liveplot/panel/.svn/text-base/BaseClassPanel.py.svn-base
- Code_Bill_et_al_2015/liveplot/panel/.svn/text-base/ImageGridPanel.py.svn-base
- Code_Bill_et_al_2015/liveplot/panel/.svn/text-base/SpiketrainPanel.py.svn-base
- Code_Bill_et_al_2015/liveplot/panel/.svn/text-base/HistogramPanel.py.svn-base
- Code_Bill_et_al_2015/liveplot/panel/.svn/text-base/TestPanel.py.svn-base
- Code_Bill_et_al_2015/liveplot/panel/.svn/prop-base/
- Code_Bill_et_al_2015/liveplot/panel/.svn/entries
- Code_Bill_et_al_2015/liveplot/panel/.svn/format
- Code_Bill_et_al_2015/liveplot/panel/RecurrentConnectionsPanel.py
- Code_Bill_et_al_2015/liveplot/panel/__init__.py
- Code_Bill_et_al_2015/liveplot/panel/EmptyPanel.py
- Code_Bill_et_al_2015/liveplot/panel/ReceptiveFieldsPanel.py
- Code_Bill_et_al_2015/liveplot/.svn/
- Code_Bill_et_al_2015/liveplot/.svn/props/
- Code_Bill_et_al_2015/liveplot/.svn/tmp/
- Code_Bill_et_al_2015/liveplot/.svn/tmp/props/
- Code_Bill_et_al_2015/liveplot/.svn/tmp/text-base/
- Code_Bill_et_al_2015/liveplot/.svn/tmp/prop-base/
- Code_Bill_et_al_2015/liveplot/.svn/all-wcprops
- Code_Bill_et_al_2015/liveplot/.svn/text-base/
- Code_Bill_et_al_2015/liveplot/.svn/text-base/__init__.py.svn-base
- Code_Bill_et_al_2015/liveplot/.svn/text-base/mpl_rc.py.svn-base
- Code_Bill_et_al_2015/liveplot/.svn/text-base/figure.py.svn-base
- Code_Bill_et_al_2015/liveplot/.svn/text-base/LivePlot.py.svn-base
- Code_Bill_et_al_2015/liveplot/.svn/text-base/shared.py.svn-base
- Code_Bill_et_al_2015/liveplot/.svn/prop-base/
- Code_Bill_et_al_2015/liveplot/.svn/entries
- Code_Bill_et_al_2015/liveplot/.svn/format
- Code_Bill_et_al_2015/liveplot/mpl_rc.py
- Code_Bill_et_al_2015/liveplot/figure.py
- Code_Bill_et_al_2015/liveplot/__init__.py
- Code_Bill_et_al_2015/liveplot/shared.py
- Code_Bill_et_al_2015/LICENCE.txt
- Code_Bill_et_al_2015/figure_format_plos.py
- Code_Bill_et_al_2015/billtool.py
- Code_Bill_et_al_2015/Fig5/
- Code_Bill_et_al_2015/Fig5/param_train_sparse_wake_sleep_cont2.py
- Code_Bill_et_al_2015/Fig5/param_train_sparse_wake_sleep_cont1.py
- Code_Bill_et_al_2015/Fig5/param_train_sparse_wake_sleep.py
- Code_Bill_et_al_2015/Fig5/param_train_sparse_local.py
- Code_Bill_et_al_2015/Fig5/train.py
- Code_Bill_et_al_2015/Fig5/param_eval.py
- Code_Bill_et_al_2015/Fig5/lpconf.py
- Code_Bill_et_al_2015/Fig5/plot.py
- Code_Bill_et_al_2015/Fig5/fig/
- Code_Bill_et_al_2015/Fig5/fig/sketch.png
- Code_Bill_et_al_2015/Fig5/fig/.svn/
- Code_Bill_et_al_2015/Fig5/fig/.svn/props/
- Code_Bill_et_al_2015/Fig5/fig/.svn/tmp/
- Code_Bill_et_al_2015/Fig5/fig/.svn/tmp/props/
- Code_Bill_et_al_2015/Fig5/fig/.svn/tmp/text-base/
- Code_Bill_et_al_2015/Fig5/fig/.svn/tmp/prop-base/
- Code_Bill_et_al_2015/Fig5/fig/.svn/all-wcprops
- Code_Bill_et_al_2015/Fig5/fig/.svn/text-base/
- Code_Bill_et_al_2015/Fig5/fig/.svn/text-base/sketch.png.svn-base
- Code_Bill_et_al_2015/Fig5/fig/.svn/text-base/2014-12-12-18-39-05_wfit.png.svn-base
- Code_Bill_et_al_2015/Fig5/fig/.svn/text-base/sketch.svg.svn-base
- Code_Bill_et_al_2015/Fig5/fig/.svn/prop-base/
- Code_Bill_et_al_2015/Fig5/fig/.svn/prop-base/sketch.png.svn-base
- Code_Bill_et_al_2015/Fig5/fig/.svn/prop-base/2014-12-12-18-39-05_wfit.png.svn-base
- Code_Bill_et_al_2015/Fig5/fig/.svn/entries
- Code_Bill_et_al_2015/Fig5/fig/.svn/format
- Code_Bill_et_al_2015/Fig5/data/
- Code_Bill_et_al_2015/Fig5/out/
- Code_Bill_et_al_2015/Fig5/.svn/
- Code_Bill_et_al_2015/Fig5/.svn/props/
- Code_Bill_et_al_2015/Fig5/.svn/tmp/
- Code_Bill_et_al_2015/Fig5/.svn/tmp/props/
- Code_Bill_et_al_2015/Fig5/.svn/tmp/text-base/
- Code_Bill_et_al_2015/Fig5/.svn/tmp/prop-base/
- Code_Bill_et_al_2015/Fig5/.svn/all-wcprops
- Code_Bill_et_al_2015/Fig5/.svn/text-base/
- Code_Bill_et_al_2015/Fig5/.svn/text-base/lpconf.py.svn-base
- Code_Bill_et_al_2015/Fig5/.svn/text-base/param_train_sparse.py.svn-base
- Code_Bill_et_al_2015/Fig5/.svn/text-base/plot.py.svn-base
- Code_Bill_et_al_2015/Fig5/.svn/text-base/param_train_nonsparse.py.svn-base
- Code_Bill_et_al_2015/Fig5/.svn/text-base/param_train.py.svn-base
- Code_Bill_et_al_2015/Fig5/.svn/text-base/fit_learning_rule.py.svn-base
- Code_Bill_et_al_2015/Fig5/.svn/text-base/param_eval.py.svn-base
- Code_Bill_et_al_2015/Fig5/.svn/text-base/gen_input_templates.py.svn-base
- Code_Bill_et_al_2015/Fig5/.svn/text-base/video.py.svn-base
- Code_Bill_et_al_2015/Fig5/.svn/text-base/train.py.svn-base
- Code_Bill_et_al_2015/Fig5/.svn/prop-base/
- Code_Bill_et_al_2015/Fig5/.svn/prop-base/param_train_sparse.py.svn-base
- Code_Bill_et_al_2015/Fig5/.svn/prop-base/plot.py.svn-base
- Code_Bill_et_al_2015/Fig5/.svn/prop-base/param_train_nonsparse.py.svn-base
- Code_Bill_et_al_2015/Fig5/.svn/prop-base/param_train.py.svn-base
- Code_Bill_et_al_2015/Fig5/.svn/prop-base/param_eval.py.svn-base
- Code_Bill_et_al_2015/Fig5/.svn/prop-base/video.py.svn-base
- Code_Bill_et_al_2015/Fig5/.svn/prop-base/train.py.svn-base
- Code_Bill_et_al_2015/Fig5/.svn/entries
- Code_Bill_et_al_2015/Fig5/.svn/format
- Code_Bill_et_al_2015/Fig5/gen_input_templates.py
- Code_Bill_et_al_2015/Fig5/HOW_TO.txt
- Code_Bill_et_al_2015/gwta_shared/
- Code_Bill_et_al_2015/gwta_shared/parallel.py
- Code_Bill_et_al_2015/gwta_shared/plotting.py
- Code_Bill_et_al_2015/gwta_shared/tools.py
- Code_Bill_et_al_2015/gwta_shared/color.py
- Code_Bill_et_al_2015/gwta_shared/input.py
- Code_Bill_et_al_2015/gwta_shared/shmarray.py
- Code_Bill_et_al_2015/gwta_shared/sampler.py
- Code_Bill_et_al_2015/gwta_shared/synapses.py
- Code_Bill_et_al_2015/gwta_shared/recurrent_plast.py
- Code_Bill_et_al_2015/gwta_shared/.svn/
- Code_Bill_et_al_2015/gwta_shared/.svn/props/
- Code_Bill_et_al_2015/gwta_shared/.svn/tmp/
- Code_Bill_et_al_2015/gwta_shared/.svn/tmp/props/
- Code_Bill_et_al_2015/gwta_shared/.svn/tmp/text-base/
- Code_Bill_et_al_2015/gwta_shared/.svn/tmp/prop-base/
- Code_Bill_et_al_2015/gwta_shared/.svn/all-wcprops
- Code_Bill_et_al_2015/gwta_shared/.svn/text-base/
- Code_Bill_et_al_2015/gwta_shared/.svn/text-base/__init__.py.svn-base
- Code_Bill_et_al_2015/gwta_shared/.svn/text-base/color.py.svn-base
- Code_Bill_et_al_2015/gwta_shared/.svn/text-base/tools.py.svn-base
- Code_Bill_et_al_2015/gwta_shared/.svn/text-base/parallel.py.svn-base
- Code_Bill_et_al_2015/gwta_shared/.svn/text-base/input.py.svn-base
- Code_Bill_et_al_2015/gwta_shared/.svn/text-base/shmarray.py.svn-base
- Code_Bill_et_al_2015/gwta_shared/.svn/text-base/sampler.py.svn-base
- Code_Bill_et_al_2015/gwta_shared/.svn/text-base/recurrent_plast.py.svn-base
- Code_Bill_et_al_2015/gwta_shared/.svn/text-base/synapses.py.svn-base
- Code_Bill_et_al_2015/gwta_shared/.svn/text-base/builder.py.svn-base
- Code_Bill_et_al_2015/gwta_shared/.svn/text-base/plotting.py.svn-base
- Code_Bill_et_al_2015/gwta_shared/.svn/prop-base/
- Code_Bill_et_al_2015/gwta_shared/.svn/prop-base/__init__.py.svn-base
- Code_Bill_et_al_2015/gwta_shared/.svn/prop-base/color.py.svn-base
- Code_Bill_et_al_2015/gwta_shared/.svn/prop-base/tools.py.svn-base
- Code_Bill_et_al_2015/gwta_shared/.svn/prop-base/parallel.py.svn-base
- Code_Bill_et_al_2015/gwta_shared/.svn/prop-base/input.py.svn-base
- Code_Bill_et_al_2015/gwta_shared/.svn/prop-base/shmarray.py.svn-base
- Code_Bill_et_al_2015/gwta_shared/.svn/prop-base/sampler.py.svn-base
- Code_Bill_et_al_2015/gwta_shared/.svn/prop-base/recurrent_plast.py.svn-base
- Code_Bill_et_al_2015/gwta_shared/.svn/prop-base/synapses.py.svn-base
- Code_Bill_et_al_2015/gwta_shared/.svn/prop-base/builder.py.svn-base
- Code_Bill_et_al_2015/gwta_shared/.svn/prop-base/plotting.py.svn-base
- Code_Bill_et_al_2015/gwta_shared/.svn/entries
- Code_Bill_et_al_2015/gwta_shared/.svn/format
- Code_Bill_et_al_2015/gwta_shared/__init__.py
- Code_Bill_et_al_2015/gwta_shared/builder.py
- Code_Bill_et_al_2015/Fig4/
- Code_Bill_et_al_2015/Fig4/param_train_wake_sleep_tst.py
- Code_Bill_et_al_2015/Fig4/param_train_local_tst.py
- Code_Bill_et_al_2015/Fig4/loglikelihood_local.py
- Code_Bill_et_al_2015/Fig4/param_train_wake_sleep.py
- Code_Bill_et_al_2015/Fig4/loglikelihood_ws.py
- Code_Bill_et_al_2015/Fig4/plot_tst.py
- Code_Bill_et_al_2015/Fig4/loglikelihood_local_tst.py
- Code_Bill_et_al_2015/Fig4/train.py
- Code_Bill_et_al_2015/Fig4/param_test.py
- Code_Bill_et_al_2015/Fig4/lpconf.py
- Code_Bill_et_al_2015/Fig4/build_inputpatterns.py
- Code_Bill_et_al_2015/Fig4/loglikelihood_ws_tst.py
- Code_Bill_et_al_2015/Fig4/plot.py
- Code_Bill_et_al_2015/Fig4/param_train_local.py
- Code_Bill_et_al_2015/Fig4/param_test_tst.py
- Code_Bill_et_al_2015/Fig4/fig/
- Code_Bill_et_al_2015/Fig4/fig/subplot_A.png
- Code_Bill_et_al_2015/Fig4/fig/.svn/
- Code_Bill_et_al_2015/Fig4/fig/.svn/props/
- Code_Bill_et_al_2015/Fig4/fig/.svn/tmp/
- Code_Bill_et_al_2015/Fig4/fig/.svn/tmp/props/
- Code_Bill_et_al_2015/Fig4/fig/.svn/tmp/text-base/
- Code_Bill_et_al_2015/Fig4/fig/.svn/tmp/prop-base/
- Code_Bill_et_al_2015/Fig4/fig/.svn/all-wcprops
- Code_Bill_et_al_2015/Fig4/fig/.svn/text-base/
- Code_Bill_et_al_2015/Fig4/fig/.svn/text-base/subplot_A.svg.svn-base
- Code_Bill_et_al_2015/Fig4/fig/.svn/prop-base/
- Code_Bill_et_al_2015/Fig4/fig/.svn/prop-base/subplot_A.svg.svn-base
- Code_Bill_et_al_2015/Fig4/fig/.svn/entries
- Code_Bill_et_al_2015/Fig4/fig/.svn/format
- Code_Bill_et_al_2015/Fig4/param_gen_y_example.py
- Code_Bill_et_al_2015/Fig4/build_testpatterns.py
- Code_Bill_et_al_2015/Fig4/data/
- Code_Bill_et_al_2015/Fig4/data/exclude_stripe_hard_42x6.npy
- Code_Bill_et_al_2015/Fig4/data/allowed_z_states.npy
- Code_Bill_et_al_2015/Fig4/data/nine_cues-7.npy
- Code_Bill_et_al_2015/Fig4/out/
- Code_Bill_et_al_2015/Fig4/out/Y_samples.npy
- Code_Bill_et_al_2015/Fig4/.svn/
- Code_Bill_et_al_2015/Fig4/.svn/props/
- Code_Bill_et_al_2015/Fig4/.svn/tmp/
- Code_Bill_et_al_2015/Fig4/.svn/tmp/props/
- Code_Bill_et_al_2015/Fig4/.svn/tmp/text-base/
- Code_Bill_et_al_2015/Fig4/.svn/tmp/prop-base/
- Code_Bill_et_al_2015/Fig4/.svn/all-wcprops
- Code_Bill_et_al_2015/Fig4/.svn/text-base/
- Code_Bill_et_al_2015/Fig4/.svn/text-base/param_test.py.svn-base
- Code_Bill_et_al_2015/Fig4/.svn/text-base/lpconf.py.svn-base
- Code_Bill_et_al_2015/Fig4/.svn/text-base/build_inputpatterns.py.svn-base
- Code_Bill_et_al_2015/Fig4/.svn/text-base/calc_allowed_states.py.svn-base
- Code_Bill_et_al_2015/Fig4/.svn/text-base/plot.py.svn-base
- Code_Bill_et_al_2015/Fig4/.svn/text-base/adapt_groundtruth.py.svn-base
- Code_Bill_et_al_2015/Fig4/.svn/text-base/build_testpatterns.py.svn-base
- Code_Bill_et_al_2015/Fig4/.svn/text-base/loglikelihood.py.svn-base
- Code_Bill_et_al_2015/Fig4/.svn/text-base/param_train.py.svn-base
- Code_Bill_et_al_2015/Fig4/.svn/text-base/fit_learning_rule.py.svn-base
- Code_Bill_et_al_2015/Fig4/.svn/text-base/adapt_groundtruth_indexed.py.svn-base
- Code_Bill_et_al_2015/Fig4/.svn/text-base/param_gen_y_example.py.svn-base
- Code_Bill_et_al_2015/Fig4/.svn/text-base/train.py.svn-base
- Code_Bill_et_al_2015/Fig4/.svn/text-base/make_vid.py.svn-base
- Code_Bill_et_al_2015/Fig4/.svn/prop-base/
- Code_Bill_et_al_2015/Fig4/.svn/prop-base/param_test.py.svn-base
- Code_Bill_et_al_2015/Fig4/.svn/prop-base/lpconf.py.svn-base
- Code_Bill_et_al_2015/Fig4/.svn/prop-base/build_inputpatterns.py.svn-base
- Code_Bill_et_al_2015/Fig4/.svn/prop-base/calc_allowed_states.py.svn-base
- Code_Bill_et_al_2015/Fig4/.svn/prop-base/plot.py.svn-base
- Code_Bill_et_al_2015/Fig4/.svn/prop-base/adapt_groundtruth.py.svn-base
- Code_Bill_et_al_2015/Fig4/.svn/prop-base/build_testpatterns.py.svn-base
- Code_Bill_et_al_2015/Fig4/.svn/prop-base/loglikelihood.py.svn-base
- Code_Bill_et_al_2015/Fig4/.svn/prop-base/param_train.py.svn-base
- Code_Bill_et_al_2015/Fig4/.svn/prop-base/adapt_groundtruth_indexed.py.svn-base
- Code_Bill_et_al_2015/Fig4/.svn/prop-base/param_gen_y_example.py.svn-base
- Code_Bill_et_al_2015/Fig4/.svn/prop-base/train.py.svn-base
- Code_Bill_et_al_2015/Fig4/.svn/prop-base/make_vid.py.svn-base
- Code_Bill_et_al_2015/Fig4/.svn/entries
- Code_Bill_et_al_2015/Fig4/.svn/format
- Code_Bill_et_al_2015/Fig4/param_train.py
- Code_Bill_et_al_2015/Fig4/calc_allowed_states.py
- Code_Bill_et_al_2015/Fig4/HOW_TO.txt
- Code_Bill_et_al_2015/my_matplotlib_defaults.py
- Code_Bill_et_al_2015/Fig2/
- Code_Bill_et_al_2015/Fig2/HOWTO.txt
- Code_Bill_et_al_2015/Fig2/compose_input.py
- Code_Bill_et_al_2015/Fig2/plot_wide.py
- Code_Bill_et_al_2015/Fig2/train.py
- Code_Bill_et_al_2015/Fig2/param_eval.py
- Code_Bill_et_al_2015/Fig2/fig/
- Code_Bill_et_al_2015/Fig2/fig/fig2c.png
- Code_Bill_et_al_2015/Fig2/fig/.svn/
- Code_Bill_et_al_2015/Fig2/fig/.svn/props/
- Code_Bill_et_al_2015/Fig2/fig/.svn/tmp/
- Code_Bill_et_al_2015/Fig2/fig/.svn/tmp/props/
- Code_Bill_et_al_2015/Fig2/fig/.svn/tmp/text-base/
- Code_Bill_et_al_2015/Fig2/fig/.svn/tmp/prop-base/
- Code_Bill_et_al_2015/Fig2/fig/.svn/all-wcprops
- Code_Bill_et_al_2015/Fig2/fig/.svn/text-base/
- Code_Bill_et_al_2015/Fig2/fig/.svn/text-base/neurons.svg.svn-base
- Code_Bill_et_al_2015/Fig2/fig/.svn/prop-base/
- Code_Bill_et_al_2015/Fig2/fig/.svn/prop-base/neurons.svg.svn-base
- Code_Bill_et_al_2015/Fig2/fig/.svn/entries
- Code_Bill_et_al_2015/Fig2/fig/.svn/format
- Code_Bill_et_al_2015/Fig2/fig/fig2a.png
- Code_Bill_et_al_2015/Fig2/fig/fig2b.png
- Code_Bill_et_al_2015/Fig2/data/
- Code_Bill_et_al_2015/Fig2/data/W.npy
- Code_Bill_et_al_2015/Fig2/data/rate_6x36_uniform.npy
- Code_Bill_et_al_2015/Fig2/data/pattern_2500x6_v2.npy
- Code_Bill_et_al_2015/Fig2/out/
- Code_Bill_et_al_2015/Fig2/.svn/
- Code_Bill_et_al_2015/Fig2/.svn/props/
- Code_Bill_et_al_2015/Fig2/.svn/tmp/
- Code_Bill_et_al_2015/Fig2/.svn/tmp/props/
- Code_Bill_et_al_2015/Fig2/.svn/tmp/text-base/
- Code_Bill_et_al_2015/Fig2/.svn/tmp/prop-base/
- Code_Bill_et_al_2015/Fig2/.svn/all-wcprops
- Code_Bill_et_al_2015/Fig2/.svn/text-base/
- Code_Bill_et_al_2015/Fig2/.svn/text-base/compose_input.py.svn-base
- Code_Bill_et_al_2015/Fig2/.svn/text-base/plot.py.svn-base
- Code_Bill_et_al_2015/Fig2/.svn/text-base/param_eval.py.svn-base
- Code_Bill_et_al_2015/Fig2/.svn/text-base/plot_wide.py.svn-base
- Code_Bill_et_al_2015/Fig2/.svn/text-base/func.py.svn-base
- Code_Bill_et_al_2015/Fig2/.svn/text-base/train.py.svn-base
- Code_Bill_et_al_2015/Fig2/.svn/prop-base/
- Code_Bill_et_al_2015/Fig2/.svn/prop-base/compose_input.py.svn-base
- Code_Bill_et_al_2015/Fig2/.svn/prop-base/plot.py.svn-base
- Code_Bill_et_al_2015/Fig2/.svn/prop-base/param_eval.py.svn-base
- Code_Bill_et_al_2015/Fig2/.svn/prop-base/plot_wide.py.svn-base
- Code_Bill_et_al_2015/Fig2/.svn/prop-base/func.py.svn-base
- Code_Bill_et_al_2015/Fig2/.svn/prop-base/train.py.svn-base
- Code_Bill_et_al_2015/Fig2/.svn/entries
- Code_Bill_et_al_2015/Fig2/.svn/format
- Code_Bill_et_al_2015/Fig2/func.py
- Code_Bill_et_al_2015/ipython_config.py
- Code_Bill_et_al_2015/Fig3/
- Code_Bill_et_al_2015/Fig3/param_eval_bernoulli_7x3_4.py
- Code_Bill_et_al_2015/Fig3/train.py
- Code_Bill_et_al_2015/Fig3/loglikelihood.py
[truncated: 63 more entries]
