# Supplementary material for: Distributed Bayesian Computation and Self-Organized Learning in Sheets of Spiking Neurons with Local Lateral Inhibition
Source: PLoS One. 2015 Aug 18;10(8):e0134356. doi: 10.1371/journal.pone.0134356 (PMC4540468; doi:10.1371/journal.pone.0134356)
Supplement: S1 Code — (ZIP) [file pone.0134356.s001.zip › Code_Bill_et_al_2015/Fig2/compose_input.py]

import numpy as np
import pylab as pl

feat = np.load('data/rate_6x36_uniform.npy')
pattern = np.load('data/pattern_2500x6_v2.npy')
outname = "data/template_2500x6x108_uni_v2.npy"


left = lambda k:  (6*(-1 + 3 * k)) % N

I = feat.shape[1]
N = 3*6*6
T = pattern.shape[0]
assert feat.shape[0] == pattern.shape[1]

X = np.zeros((T,N))

for t,p in zip(xrange(T), pattern):
    for k in p.nonzero()[0]:
        x = np.zeros(N)
        x[:I] = feat[k]
        X[t] += np.roll(x, left(k))

np.save(outname, X)
