# Supplementary material for: Distributed Bayesian Computation and Self-Organized Learning in Sheets of Spiking Neurons with Local Lateral Inhibition
Source: PLoS One. 2015 Aug 18;10(8):e0134356. doi: 10.1371/journal.pone.0134356 (PMC4540468; doi:10.1371/journal.pone.0134356)
Supplement: S1 Code — (ZIP) [file pone.0134356.s001.zip › Code_Bill_et_al_2015/Fig2/HOWTO.txt]

# Figure 2 Bill et al., PLoS One 2015
# Runs with python 2.7.3, numpy 1.6.2, matplotlib 1.1.1rc2, ipython 1.2.1 on Linux 2 systems

1.) ipython compose_input.py

# Creates the inputs for the network and saves the results in data/

2.) ipython train.py param_eval

# Outputs are written in the "out/Fig2_eval/" directory 

3.) ipython plot_wide.py

# Plots Figure 2
# The figure is written into the fig directory.
