# Supplementary material for: Distributed Bayesian Computation and Self-Organized Learning in Sheets of Spiking Neurons with Local Lateral Inhibition
Source: PLoS One. 2015 Aug 18;10(8):e0134356. doi: 10.1371/journal.pone.0134356 (PMC4540468; doi:10.1371/journal.pone.0134356)
Supplement: S1 Code — (ZIP) [file pone.0134356.s001.zip › Code_Bill_et_al_2015/Fig3/HOW_TO.txt]

# Figure 3 Bill et al., PLoS One 2015
# Runs with python 2.7.3, numpy 1.6.2, matplotlib 1.1.1rc2, ipython 1.2.1 on Linux 2 systems

1.) Unzip any files in this directory

2.) ipython generate_input.py

# Generates the input patterns for training. Writes to data/

2.) ipython train.py param_train_bernoulli_7x3

# This writes results into out/Fig3_train/

3.) ipython train.py param_eval_bernoulli_7x3_1
4.) ipython train.py param_eval_bernoulli_7x3_2
5.) ipython train.py param_eval_bernoulli_7x3_3
6.) ipython train.py param_eval_bernoulli_7x3_4

# These steps evaluate the network after four different times during training
# The times can be set in the scripts
# They write the results in out/Fig3_eval1 to out/Fig3_eval4

7.) ipython loglikelihood.py

# Evaluates the log-likelihood at various times of training
# Times of evaluation can be set in the script
# Writes results into out/Fig3_train/

8.) ipython plot.py

# Plots the figure
