# Supplementary material for: Distributed Bayesian Computation and Self-Organized Learning in Sheets of Spiking Neurons with Local Lateral Inhibition
Source: PLoS One. 2015 Aug 18;10(8):e0134356. doi: 10.1371/journal.pone.0134356 (PMC4540468; doi:10.1371/journal.pone.0134356)
Supplement: S1 Code — (ZIP) [file pone.0134356.s001.zip › Code_Bill_et_al_2015/Fig4/build_inputpatterns.py]

import numpy as np
import pylab as pl
from gwta import joint_of_BM_indexed

outname = "./data/exclude_stripe_42x6.npy"

gen_local = lambda n, dims: np.tile([[(k-n) % 3 == 0] for k in xrange(dims[0])], reps=(1, dims[1]))

def build(c):
    for i,j in enumerate(c):
        if i == 0:
            a = pat[i][j]
        else:
            a = np.append(a, pat[i][j], axis=0)
    return a


patL = [gen_local(n, (6,6)) for n in xrange(3)]
patC = [gen_local(n, (6,6)) for n in xrange(3)]
patR = [gen_local(n, (6,6)) for n in xrange(3)]

pat = [patL, patC, patC, patC, patC, patC, patR]        # pat[i,j] = pat[position, type]

#Z = np.load('data/z_states_separate.npy')
#T,K = Z.shape
#W = np.zeros((K,K))
#for i in xrange(3):
    ## Cues
    #for j in xrange(1,3):
        #W[i,3+(i+j)%3:-6+(i+j)%3+1:3] = 2.5
        #W[-3+i,3+(i+j)%3:-6+(i+j)%3+1:3] = 2.5
        #W[3+(i+j)%3:-6+(i+j)%3+1:3,i] = 2.5
        #W[3+(i+j)%3:-6+(i+j)%3+1:3,-3+i] = 2.5
    ## inner
    #W[3+i:-6+i+1:3,3+i:-6+i+1:3] = 2.5
#W -= np.diag(W.diagonal())


#P = joint_of_BM_indexed(1*np.ones(K), W, Z)[1]
#prob  = np.array([p for p,z in zip(P,Z)], dtype=float)
#comb = np.array([z.reshape(5,3).argmax(1) for p,z in zip(P,Z)], dtype=int)


#N = 10000
#num = np.random.multinomial(N, P)

#out = np.zeros((N,)+build([0]*len(pat)).shape, dtype=int)
#i = 0
#for n,c in zip(num,comb):
    #a = build(c)
    #out[i:i+int(n)] = a
    #i += int(n)

#np.save(outname, out)
#raise Exception


## comb'n'probs
#prob = np.array([
        ## per cue combination:
        #(0.1 , [0,0,0]),
        #(0.45 , [0,1,0]),
        #(0.45 , [0,2,0]),
        #(0.05 , [0,0,1]),
        #(0.05 , [0,1,1]),
        #(0.9 , [0,2,1]),
        #(0.05 , [0,0,2]),
        #(0.9 , [0,1,2]),
        #(0.05 , [0,2,2]),
        ## 1*
        #(0.05 , [1,0,0]),
        #(0.05 , [1,1,0]),
        #(0.9 , [1,2,0]),
        #(0.45 , [1,0,1]),
        #(0.1 , [1,1,1]),
        #(0.45 , [1,2,1]),
        #(0.9 , [1,0,2]),
        #(0.05 , [1,1,2]),
        #(0.05 , [1,2,2]),
        ## 2*     
        #(0.05 , [2,0,0]),
        #(0.9 , [2,1,0]),
        #(0.05 , [2,2,0]),
        #(0.9 , [2,0,1]),
        #(0.05 , [2,1,1]),
        #(0.05 , [2,2,1]),
        #(0.45 , [2,0,2]),
        #(0.45 , [2,1,2]),
        #(0.1 , [2,2,2])],
    #dtype=object)
#prob[:,0] *= 1./9.


# comb'n'probs
prob = np.array([
        # per cue combination:
        (0.5 , [0,1,0]),
        (0.5 , [0,2,0]),
        (1.0 , [0,2,1]),
        (1.0 , [0,1,2]),
        # 1*
        (1.0 , [1,2,0]),
        (0.5 , [1,0,1]),
        (0.5 , [1,2,1]),
        (1.0 , [1,0,2]),
        # 2*
        (1.0 , [2,1,0]),
        (1.0 , [2,0,1]),
        (0.5 , [2,0,2]),
        (0.5 , [2,1,2])],
    dtype=object)
prob[:,0] *= 1./9.


for i,(p,c) in enumerate(prob):
    prob[i,1] = [c[0],c[1],c[1],c[1],c[1],c[1],c[2]]

# granularity
N = 18
#while not np.allclose(prob[:,0] * N % 1, 0): N += 1

print "Granularity =", N
prob[:,0] *= N


out = np.zeros((N,)+build([0]*len(pat)).shape, dtype=int)
i = 0
for n,c in prob:
    a = build(c)
    out[i:i+int(n)] = a
    i += int(n)


##np.save(outname, out)
