# Supplementary material for: Distributed Bayesian Computation and Self-Organized Learning in Sheets of Spiking Neurons with Local Lateral Inhibition
Source: PLoS One. 2015 Aug 18;10(8):e0134356. doi: 10.1371/journal.pone.0134356 (PMC4540468; doi:10.1371/journal.pone.0134356)
Supplement: S1 Code — (ZIP) [file pone.0134356.s001.zip › Code_Bill_et_al_2015/Fig4/build_testpatterns.py]

import numpy as np
import pylab as pl


gen_local = lambda n, dims: np.tile([[(k-n) % 3 == 0] for k in xrange(dims[0])], reps=(1, dims[1]))

def build(c):
    for i,j in enumerate(c):
        if i == 0:
            a = pat[i][j]
        else:
            a = np.append(a, pat[i][j], axis=0)
    return a


patL = [gen_local(n, (6,6)) for n in xrange(3)]
patC = [0.5 * np.ones((6,6)) for n in xrange(1)]
patR = [gen_local(n, (6,6)) for n in xrange(3)]

pat = [patL, patC, patC, patC, patR]


N = 9
out = np.zeros((N,)+build([0]*len(pat)).shape, dtype=float)

i = 0
for cl in xrange(3):
    for cr in xrange(3):
        c = [cl,0,0,0,cr]
        a = build(c)
        out[i] = a
        i += 1
