# Supplementary material for: Distributed Bayesian Computation and Self-Organized Learning in Sheets of Spiking Neurons with Local Lateral Inhibition
Source: PLoS One. 2015 Aug 18;10(8):e0134356. doi: 10.1371/journal.pone.0134356 (PMC4540468; doi:10.1371/journal.pone.0134356)
Supplement: S1 Code — (ZIP) [file pone.0134356.s001.zip › Code_Bill_et_al_2015/Fig4/calc_allowed_states.py]

import numpy as np
from time import time

dsl = '2013-10-24-17-39-28'

W_mask = np.load('data/'+dsl+'_W_mask.npy')

K = W_mask.shape[0]
out = []

current_state = np.zeros(K, dtype='bool')

incompatible = dict()
for k in xrange(K):
    incompatible[k] = list( (W_mask[k]==False).nonzero()[0] )
    incompatible[k].remove(k)
    #idx = range(K)
    #idx.remove(k)
    #np.random.shuffle(idx)
    #incompatible[k] = idx[:24]

def do(k, state):
    global current_state
    current_state[:] = state
    # check if state is compatible
    if state[k]:
        for i in state.nonzero()[0]:
            if i in incompatible[k]:
                #print "%d is incom with %d" % (k,i)
                return
    # the state is valid
    # is it complete?
    if k == K-1:
        out.append(state.copy())
        return
    # else: call sub states
    do(k+1, state.copy())      # zero
    s = state.copy()
    s[k+1] = True
    do(k+1, s)

t0 = time()

s0 = np.zeros(K, dtype='bool')
do(0, s0)
s0[0] = True
do(0, s0)

print "K=%d : time = %.3fs" % (K, time()-t0)

np.save("data/%s_allowed_z_states" % dsl, out)

#for s in out: print s
