# Supplementary material for: Distributed Bayesian Computation and Self-Organized Learning in Sheets of Spiking Neurons with Local Lateral Inhibition
Source: PLoS One. 2015 Aug 18;10(8):e0134356. doi: 10.1371/journal.pone.0134356 (PMC4540468; doi:10.1371/journal.pone.0134356)
Supplement: S1 Code — (ZIP) [file pone.0134356.s001.zip › Code_Bill_et_al_2015/Fig4/HOW_TO.txt]

# Figure 4 Bill et al., PLoS One 2015
Runs with python 2.7.3, numpy 1.6.2, matplotlib 1.1.1rc2, ipython 1.2.1 on Linux 2 systems

1.) ipython train.py param_train_wake_sleep.py

# Trains the network with theoretical wake-sleep learning
# Determines the parameters for the approximate rule

2.) ipython train.py param_train_local

# Trains network with fitted local learning rule

3.) ipython loglikelihood_ws.py 

# Evaluates the log-likelihood at various times of wake-sleep training 
# Times of evaluation can be set in the script

4.) ipython loglikelihood_local.py 

# Evaluates the log-likelihood at various times of heuristic training 

5.) ipython train.py param_test

# Test network

6.) ipython train.py param_gen_y_example

# creates an input example for plotting

6.) ipython plot.py

# Plots the figure
