# Supplementary material for: Distributed Bayesian Computation and Self-Organized Learning in Sheets of Spiking Neurons with Local Lateral Inhibition
Source: PLoS One. 2015 Aug 18;10(8):e0134356. doi: 10.1371/journal.pone.0134356 (PMC4540468; doi:10.1371/journal.pone.0134356)
Supplement: S1 Code — (ZIP) [file pone.0134356.s001.zip › Code_Bill_et_al_2015/Fig5/HOW_TO.txt]

# Figure 5 Bill et al., PLoS One 2015
# Runs with python 2.7.3, numpy 1.6.2, matplotlib 1.1.1rc2, ipython 1.2.1 on Linux 2 systems

1.) ipython gen_input_templates.py 

# generates input to the network. Saves results in the data/ directory

2.) ipython train.py param_train_sparse_wake_sleep

# Trains the network with theoretical wake-sleep learning

3.) ipython train.py param_train_sparse_wake_sleep_cont1

# Continues wake-sleep training (necessary due to extensive memory usage)
# (If you encounter memory problems, try to reduce individual training times (T_si)
# and run several times)

3.) ipython train.py param_train_sparse_wake_sleep_cont2

# Continues wake-sleep learning with reduced learning rate
# Determines the parameters for the approximate rule

4.) ipython train.py param_train_sparse_local

# Trains network with fitted local learning rule

5.) ipython train.py param_eval

# Evaluates stuff

6.) ipython plot.py

# Plots the figure
