# Supplementary material for: Distributed Bayesian Computation and Self-Organized Learning in Sheets of Spiking Neurons with Local Lateral Inhibition
Source: PLoS One. 2015 Aug 18;10(8):e0134356. doi: 10.1371/journal.pone.0134356 (PMC4540468; doi:10.1371/journal.pone.0134356)
Supplement: S1 Code — (ZIP) [file pone.0134356.s001.zip › Code_Bill_et_al_2015/figure_format_plos.py]

import matplotlib as mpl

name = "Figure Settings for PLoS"

cm2inch = lambda x: 0.393700787 * x

# for pnas
#fig_width = dict(
    #one_col = cm2inch(8.7),
    #two_col = cm2inch(18.0)
    #)

#for plos
fig_width = dict(
    one_col = cm2inch(8.3),
    two_col = cm2inch(17.35)
    )

font_panellabel = dict(fontweight='bold', fontsize=12, ha='left')

config = {
    'axes' : dict(labelsize=8, titlesize=8, linewidth=0.5),
    #'figure' : dict(dpi=200, figsize=[fig_width['one_col'], 0.75*fig_width['one_col']], facecolor='white'),
    'figure' : dict(dpi=87, figsize=[fig_width['one_col'], 0.75*fig_width['one_col']], facecolor='white'),
    'figure.subplot' : dict(left=0.15, bottom=0.15, right=0.97, top=0.97),
    'font' : {'family' : 'sans-serif', 'size' : 8, 'weight' : 'lighter', 'sans-serif' : 'Arial'},
    'image' : dict(cmap='RdBu_r' , interpolation='nearest'),
    'legend' : dict(fontsize=8, axespad=0.03, borderpad=0.3),
    'lines' : dict(linewidth=0.5),
    'xtick' : dict(labelsize=8),
    'xtick.major' : dict(size=2, pad=2),
    'ytick' : dict(labelsize=8),
    'ytick.major' : dict(size=2, pad=2),
    'savefig' : dict(dpi=600)
    }

print "\n\t * * * Importing '%s' * * *\n" % name

for key,val in config.iteritems():
    s = ""
    for k,v in val.iteritems():
        s += k + "=%s, " % str(v)
    print "  > Set '%s' to %s" % (key, s[:-2])
    mpl.rc(key, **val)

print '\n\n'
