# Supplementary material for: Distributed Bayesian Computation and Self-Organized Learning in Sheets of Spiking Neurons with Local Lateral Inhibition
Source: PLoS One. 2015 Aug 18;10(8):e0134356. doi: 10.1371/journal.pone.0134356 (PMC4540468; doi:10.1371/journal.pone.0134356)
Supplement: S1 Code — (ZIP) [file pone.0134356.s001.zip › Code_Bill_et_al_2015/gwta_shared/__init__.py]

print "\n > Importing GWTA code package."

import color

from sampler import SamplerAbsref, SamplerGibbs

from tools import joint_from_data, joint_of_BM, KL, extract_params, Logger, DSL, get_param_file, memorycheck, rec_update, ParameterEvolution, joint_of_BM_indexed, calc_marginals, calc_marginals_indexed

from parallel import shmarray, Coordinator

from synapses import PoissonSynapses, BernoulliSynapses

from recurrent_plast import wake_sleep_plasticity, covariance_plasticity_tan

from builder import NetworkBuilder

from input import FromTemplatePoissonGenerator, FromTemplateBernoulliGenerator, FromFileLoader, applyPSPkernel, applyFastBinaryKernel

from plotting import LiveRecurrent, LivePlotter, plot_spiketrain, plot_styletrain, plot_colored_styletrain

#from input import GaussianMixtureInput, PoissonMixtureInput, BernoulliMixtureInput, FromFileMNISTBernoulliInput

#from tools import extract_params, rec_update, PCAplot, TuningPlot, TemplatePlot, load_data, pick_proportion
