# Supplementary material for: Distributed Bayesian Computation and Self-Organized Learning in Sheets of Spiking Neurons with Local Lateral Inhibition
Source: PLoS One. 2015 Aug 18;10(8):e0134356. doi: 10.1371/journal.pone.0134356 (PMC4540468; doi:10.1371/journal.pone.0134356)
Supplement: S1 Code — (ZIP) [file pone.0134356.s001.zip › Code_Bill_et_al_2015/HOW_TO.txt]

Code for simulations in Bill et al.
Distributed Bayesian computation and self-organized learning in sheets of spiking neurons with local lateral inhibition 
PLoS One 2015

The provided scripts are tested on
python 2.7.3, numpy 1.6.2, matplotlib 1.1.1rc2, ipython 1.2.1 on Linux 2 systems

To configure your ipython correctly, use the settings provided in ipython_config.py provided in this directory
(either adjust your ipython_config.py or use this one in $HOME/.ipython/profile_default/)

Change into the Figure-directory where code needed to produce a given figure (e.g. Fig2/) is provided.
Follow the instructions given in HOW_TO.txt
