# Supplementary material for: Distributed Bayesian Computation and Self-Organized Learning in Sheets of Spiking Neurons with Local Lateral Inhibition
Source: PLoS One. 2015 Aug 18;10(8):e0134356. doi: 10.1371/journal.pone.0134356 (PMC4540468; doi:10.1371/journal.pone.0134356)
Supplement: S1 Code — (ZIP) [file pone.0134356.s001.zip › Code_Bill_et_al_2015/ipython_config.py]

# Configuration file for ipython.

c = get_config()

#------------------------------------------------------------------------------
# InteractiveShellApp configuration
#------------------------------------------------------------------------------

# A Mixin for applications that start InteractiveShell instances.
# 
# Provides configurables for loading extensions and executing files as part of
# configuring a Shell environment.
# 
# The following methods should be called by the :meth:`initialize` method of the
# subclass:
# 
#   - :meth:`init_path`
#   - :meth:`init_shell` (to be implemented by the subclass)
#   - :meth:`init_gui_pylab`
#   - :meth:`init_extensions`
#   - :meth:`init_code`


# Pre-load matplotlib and numpy for interactive use, selecting a particular
# matplotlib backend and loop integration.
c.InteractiveShellApp.pylab = 'auto'

# If a command or file is given via the command-line, e.g. 'ipython foo.py
c.TerminalIPythonApp.force_interact = True


# Whether to display a banner upon starting IPython.
c.TerminalIPythonApp.display_banner = False


# Make IPython automatically call any callable object even if you didn't type
# explicit parentheses. For example, 'str 43' becomes 'str(43)' automatically.
# The value can be '0' to disable the feature, '1' for 'smart' autocall, where
# it is not applied if there are no more arguments on the line, and '2' for
# 'full' autocall, where all callable objects are automatically called (even if
# no arguments are present).
c.TerminalInteractiveShell.autocall = 1


# Set to confirm when you try to exit IPython with an EOF (Control-D in Unix,
# Control-Z/Enter in Windows). By typing 'exit' or 'quit', you can force a
# direct exit without any confirmation.
c.TerminalInteractiveShell.confirm_exit = False


# Due to an issue with fcntl, SQLite is known to misbehave on some NFS mounts.
# If you see IPython hanging, try setting this to something on a local disk,
# e.g::
# 
#     ipython --HistoryManager.hist_file=/tmp/ipython_hist.sqlite
c.HistoryManager.hist_file = u'/tmp/ipython_hist.user.sqlite'
