# Supplementary material for: Distributed Bayesian Computation and Self-Organized Learning in Sheets of Spiking Neurons with Local Lateral Inhibition
Source: PLoS One. 2015 Aug 18;10(8):e0134356. doi: 10.1371/journal.pone.0134356 (PMC4540468; doi:10.1371/journal.pone.0134356)
Supplement: S1 Code — (ZIP) [file pone.0134356.s001.zip › Code_Bill_et_al_2015/liveplot/panel/__init__.py]

from BaseClassPanel import BaseClassPanel
from EmptyPanel import EmptyPanel
from TestPanel import TestPanel
from BarPanel import BarPanel
from HistogramPanel import HistogramPanel
from ImageGridPanel import ImageGridPanel
from SpiketrainPanel import SpiketrainPanel
from RecurrentConnectionsPanel import RecurrentConnectionsPanel
from ReceptiveFieldsPanel import ReceptiveFieldsPanel
