# Supplementary material for: Distributed Bayesian Computation and Self-Organized Learning in Sheets of Spiking Neurons with Local Lateral Inhibition
Source: PLoS One. 2015 Aug 18;10(8):e0134356. doi: 10.1371/journal.pone.0134356 (PMC4540468; doi:10.1371/journal.pone.0134356)
Supplement: S1 Code — (ZIP) [file pone.0134356.s001.zip › Code_Bill_et_al_2015/liveplot/panel/BaseClassPanel.py]

class BaseClassPanel(object):
    def __init__(self, ax):
        self.ax = ax
    def setup(self, **initKwargs):
        NotImplemented
    def update(self, **updateKwargs):
        NotImplemented
