# Supplementary material for: Distributed Bayesian Computation and Self-Organized Learning in Sheets of Spiking Neurons with Local Lateral Inhibition
Source: PLoS One. 2015 Aug 18;10(8):e0134356. doi: 10.1371/journal.pone.0134356 (PMC4540468; doi:10.1371/journal.pone.0134356)
Supplement: S1 Code — (ZIP) [file pone.0134356.s001.zip › Code_Bill_et_al_2015/liveplot/panel/EmptyPanel.py]

from BaseClassPanel import BaseClassPanel

class EmptyPanel(BaseClassPanel):
    def __init__(self, ax):
        super(EmptyPanel, self).__init__(ax)
        self.ax.set_zorder(0)
        self.ax.set_visible(False)
