# Supplementary material for: Distributed Bayesian Computation and Self-Organized Learning in Sheets of Spiking Neurons with Local Lateral Inhibition
Source: PLoS One. 2015 Aug 18;10(8):e0134356. doi: 10.1371/journal.pone.0134356 (PMC4540468; doi:10.1371/journal.pone.0134356)
Supplement: S1 Code — (ZIP) [file pone.0134356.s001.zip › Code_Bill_et_al_2015/liveplot/panel/TestPanel.py]

from BaseClassPanel import BaseClassPanel

class TestPanel(BaseClassPanel):
    def __init__(self, ax):
        super(TestPanel, self).__init__(ax)
        print "TestPanel:", self, "created."
    def setup(self, a):
        self.a = a
        print "TestPanel:", self, "initialized."
    def update(self, data):
        self.data = data
        self.ax.clear()
        self.ax.text(0.5, 0.5, "a=%s; data=%s" % (str(self.a), str(self.data)))
        print "TestPanel:", self
        print "  Init:", self.a
        print "  Update:", self.data
